# Supplementary material for: Optimizing the amount of pig manure in the vermicomposting of spent mushroom (Lentinula) substrate
Source: PeerJ. 2020 Dec 18;8:e10584. doi: 10.7717/peerj.10584 (PMC7751411; doi:10.7717/peerj.10584)
Supplement: Supplemental Information 1 — Values are mean ± standard error (n = 3). Means in a row followed by different letters are significantly different at p < 0.05 according to Tukey HSD test. [file peerj-08-10584-s001.xlsx]

## Sheet: Sheet1
Table1	Physico-chemical characteristics of the various substrates used for vermicomposting. Values are mean ± standard error (n=3). Means in a row followed by different letters are significantly different at p＜ 0.05 according to Tukey HSD test.
	Parameters	S0	S1	S2	S3	S4	One-way ANOVA
							F value	P value
	Initial TN（g kg-1）	4.71±0.29d	5.37±0.14dc	6.13±0.28c	7.54±0.29b	10.19±0.29a	64.26	0
	Final TN（g kg-1）	3.64±0.37d	3.59±0.16d	4.67±0.45c	5.77±0.21b	7.05±0.21a	75.98	0
	Initial TOC（g kg-1）	26.32±0.23a	25.02±0.19b	24.91±0.29c	23.76±0.10d	22.92±0.35e	10.51	0.001
	Final TOC（g kg-1）	23.27±0.35a	20.51±0.15b	20.01±0.79b	20.09±0.22b	20.12±0.24b	5.36	0.014
	Initial pH	8.81±0.03a	8.78±0.04a	8.74±0.03a	8.81±0.03a	8.83±0.03a	39.35	0
	Final pH	8.38±0.14a	8.14±0.13ab	8.01±0.06b	7.99±0.09b	7.60±0.12c	18.11	0
	Initial EC (ms cm-1)	217.00±9.54b	202.17±8.28c	201±7.81c	218.67±8.02b	241.00±6.56a	12.01	0.001
	Final EC (ms cm-1)	243.67±14.22c	306.67±12.74c	395.67±44.66b	578.33±81.09a	615.67±13.20a	44.28	0
