# Supplementary material for: Optimizing the amount of pig manure in the vermicomposting of spent mushroom (Lentinula) substrate
Source: PeerJ. 2020 Dec 18;8:e10584. doi: 10.7717/peerj.10584 (PMC7751411; doi:10.7717/peerj.10584)
Supplement: Supplemental Information 2 — Values are mean ± standard error (n = 3). Means in a row followed by different letters are significantly different at p < 0.05 according to Tukey HSD test. [file peerj-08-10584-s002.xlsx]

## Sheet: Sheet1
Table2
	Biomass and mortality rates of the earthworm (Eisenia fetida). Values are mean ± standard error (n=3). Means in a row followed by different letters are significantly different at p＜ 0.05 according to Tukey HSD test.
	Parameters	S0	S1	S2	S3	S4	One-way ANOVA
							F value	P value
	Mean weight of earthworm in the initial time (g)	14.03±5.5a	14.79±8.1a	14.96±14.8a	14.54±3.0a	14.50±16.7a	1.095	0.405
	Mean weight of earthworm at 28th day (g)	7.05±1.05d	11.5±1.45cd	17.6±1.22a	13.07±1.46b	9.70±1.03c	29.69	＜0.001
	Mean weight of earthworm at 56th day (g)	1.13±0.99c	5.93±1.16b	10.56±1.03a	6.01±0.67b	2.27±0.31c	52.81	＜0.001
	Mortality rate after 28 days (%)	36.67±5.77a	20.00±6.55b	0	6.67±1.55b	23.33±5.77ab	10.39	＜0.001
	Mortality rate at 56 days (%)	90.00±8.82a	24.44±11.7c	1.11±1.92d	26.67±5.77c	73.33±3.33b	81.36	＜0.001
