# Supplementary material for: Optimizing the amount of pig manure in the vermicomposting of spent mushroom (Lentinula) substrate
Source: PeerJ. 2020 Dec 18;8:e10584. doi: 10.7717/peerj.10584 (PMC7751411; doi:10.7717/peerj.10584)
Supplement: Supplemental Information 3 — Vertical bars in the figures represent standard error of the means (n = 3). [file peerj-08-10584-s003.xlsx]

## Sheet: Lignin
	Lignin
		S0	stdev（）	S1	stdev（）	S2	stdev（）	S3	stdev（）	S4	stdev（）
	0	0.09744	0.00721	0.09654	0.00637	0.09196	0.00411	0.08032	0.00181	0.07728	0.00579
	14	0.05762	0.00575	0.06584	0.00741	0.07462	0.00468	0.05374	0.00912	0.05232	0.005
	28	0.04347	0.00456	0.05745	0.01089	0.03275	0.0055	0.04325	0.00681	0.04713	0.00221
	42	0.04189	0.00562	0.04342	0.00335	0.02257	0.00226	0.03814	0.004	0.03937	0.00335
	56	0.04147	0.00354	0.03979	0.00244	0.0211	0.00667	0.03289	0.00206	0.03583	0.00399

## Sheet: cellulose
	cellulose
		S0	stdev（）	S1	stdev（）	S2	stdev（）	S3	stdev（）	S4	stdev（）
	0	0.32328	0.00552	0.31651	0.01743	0.31401	0.01162	0.30654	0.00659	0.29737	0.00183
	14	0.30677	0.00351	0.24174	0.00666	0.29338	0.00747	0.29108	0.02196	0.24136	0.00239
	28	0.25833	0.00845	0.23016	0.00938	0.20682	0.00922	0.1867	0.00914	0.23458	0.00608
	42	0.25342	0.00988	0.21971	0.01303	0.20637	0.01372	0.1645	0.01	0.21934	0.01533
	56	0.25073	0.01017	0.21725	0.01031	0.17181	0.00959	0.15825	0.01267	0.21526	0.01358

## Sheet: Degradation rate of lignin
	Degradation rate of lignin
			S0（%）	stdev（）	S1（%）	stdev（）	S2（%）	stdev（）	S3（%）	stdev（）	S4（%）	stdev（）
		14	29.8314	1.23021	31.7993	5.76501	18.8528	4.96288	33.0947	12.5376	32.3016	11.484
		28	16.4919	5.32054	40.4868	9.40567	64.3823	5.72612	46.1503	9.68209	39.0223	3.27338
		42	16.4848	3.97137	55.0187	6.56646	75.4524	14.8879	52.5113	7.44533	49.0567	12.4666
		56	26.8616	2.4983	58.7829	17.4408	77.0542	13.2784	59.054	7.91558	53.6334	13.6716

## Sheet: Degradation rate of cellulose
	Degradation rate of cellulose
			S0（%）	stdev（）	S1（%）	stdev（）	S2（%）	stdev（）	S3（%）	stdev（）	S4（%）	stdev（）
		14	5.11004	2.12483	23.6228	4.07558	6.57138	2.12984	5.04334	1.33553	18.8369	1.75364
		28	20.0937	3.64371	27.2821	2.15008	34.1362	3.35232	39.0943	3.86556	21.1145	1.48674
		42	21.6103	5.06472	30.5841	2.31247	34.2801	4.45907	46.3364	8.04537	26.2424	5.80124
		56	22.4415	1.2632	31.36	1.93035	45.2867	2.85243	48.3746	2.16596	27.6137	1.21207

## Sheet: cellulase
	cellulase
		S0	stdev（）	S1	stdev（）	S2	stdev（）	S3	stdev（）	S4	stdev（）
	0	0.20202	0.00901	0.2511	0.0043	0.2482	0.0363	0.1241	0.0175	0.16162	0.0025
	14	0.16234	0.00693	0.24315	0.01058	0.18081	0.01999	0.21544	0.01058	0.36089	0.02884
	28	0.12237	0.02224	0.22393	0.01742	0.27936	0.02799	0.32323	0.09455	0.2355	0.02497
	42	0.16003	0.01058	0.25166	0.02884	0.35093	0.04174	0.45023	0.04155	0.12697	0.02884
	56	0.1108	0.02498	0.12697	0.01442	0.20083	0.04324	0.19853	0.02113	0.0577	0.00398

## Sheet: ppo
	polyphenol oxidase		PPO
		S0	stdev（）	S1	stdev（）	S2	stdev（）	S3	stdev（）	S4	stdev（）
	0	26.667	4.1633	18.667	5.0332	23.333	3.0551	16	2	17.333	3.0551
	14	20.667	2.3094	25.733	7.5507	22.667	2.3094	13.333	2.3094	12	2
	28	24.667	4.1633	22	6	46	4	23.333	3.0551	13.333	3.0551
	42	42	7.2111	40.667	7.5719	49.333	6.1101	50.667	6.1101	73.333	13.3167
	56	39.333	5.0332	94.667	11.3725	72	6.9282	62	6.9282	25.333	4.6188
