# Supplementary material for: Optimizing the amount of pig manure in the vermicomposting of spent mushroom (Lentinula) substrate
Source: PeerJ. 2020 Dec 18;8:e10584. doi: 10.7717/peerj.10584 (PMC7751411; doi:10.7717/peerj.10584)
Supplement: Supplemental Information 4 — 1.25% extractions of SMS products in different treatments after 56 days of vermicomposting were used in this germination test. Vertical bars in the figures represent standard error of the means (n = 3). [file peerj-08-10584-s004.xlsx]

## Sheet: Sheet1
	GI
		mean value	stdev
	S0	93.9137	1.3768
	S1	124.396	2.3768
	S2	127.66	2.78014
	S3	119.302	1.34784
	S4	114.717	3.20988
